# Supplementary material for: Phage defence loci of Streptococcus thermophilus—tip of the anti-phage iceberg?
Source: PubMed Central journal article supplement (PMC11514479; doi:10.1093/nar/gkae814), 2024-09-24
Supplement: gkae814_supplemental_file.pdf [file gkae814_supplemental_file.pdf]

### Supplementary Figure S1:

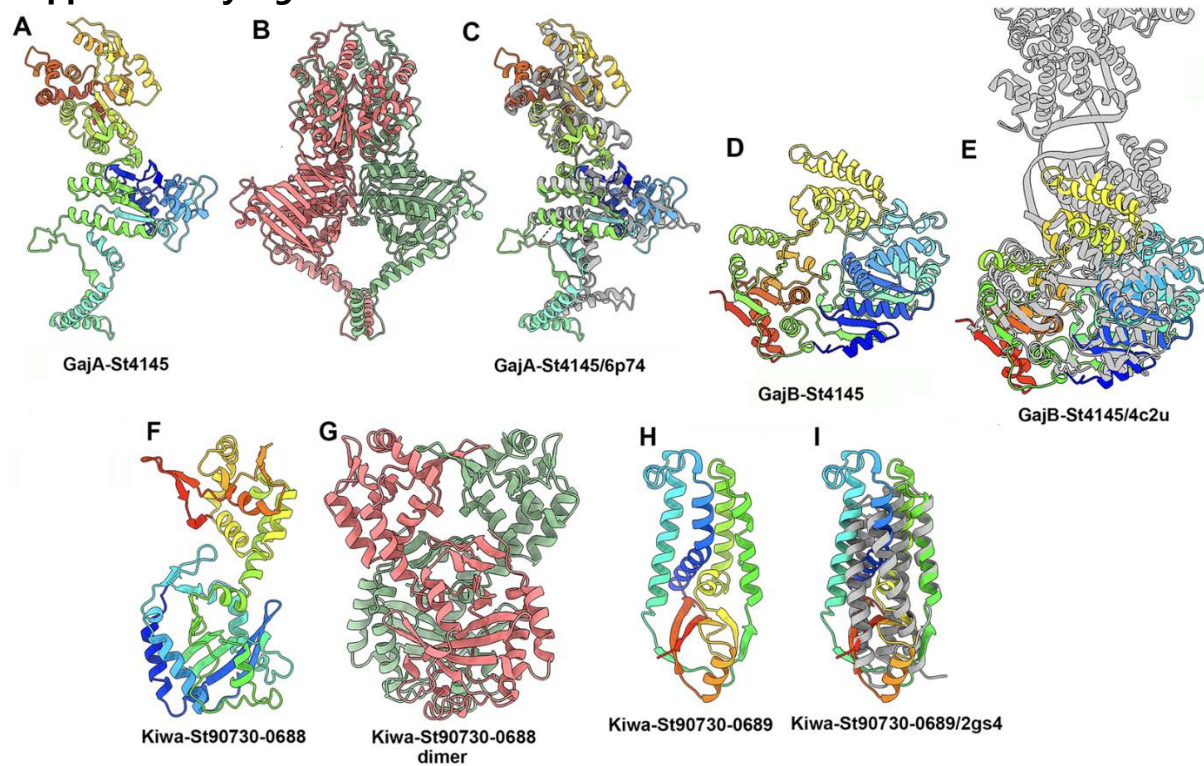

**Fig. S1** Structure prediction of Gabija and Kiwa proteins. **(A)** Ribbon structure of GajA<sub>4145</sub> (rainbow coloured); **(B)** Dimer of GajA<sub>4145</sub>. **(C)** Superimposition of GajA<sub>4145</sub> with PDB 6p74, a Class 1 OLD family nuclease (grey; Z=20.2, rmsd =5.6 Å). **(D)** Ribbon structure of GajB<sub>4021</sub> (rainbow coloured); **(E)** Superimposition of GajB<sub>4021</sub> with PDB 4c2u, a helicase in complex with DNA (grey; Z=24.1, rmsd =3.7 Å). **(F)** Ribbon structure of KwaB<sub>90730</sub> (rainbow coloured); **(G)** Ribbon structure of KwaB<sub>90730</sub> dimer. **(H)** Ribbon structure of KwaA<sub>90730</sub> (rainbow coloured); **(I)** Superimposition of KwaA<sub>90730</sub> with PDB 2gs4 (Z=5.1, rmsd =5.7 Å).

## Supplementary Figure S2:

**Fig. S2.** AlphaFold prediction of AbiD proteins encoded by *S. thermophilus* **(A)** ST55 (orange), **(B)** 4078 (blue), **(C)** 4021 (pink) and **(D)** *Lactococcus* (green). The lower panel **(E)** is a superimposition of AbiD-ST55 with PDB ID 6iv9 (Z=7.7; rmsd=3.9Å) a CRISPR-associated endoribonuclease Cas13D. **(F)** Superimposition of the four AbiD proteins showing their common central core Cas13D-like fold.

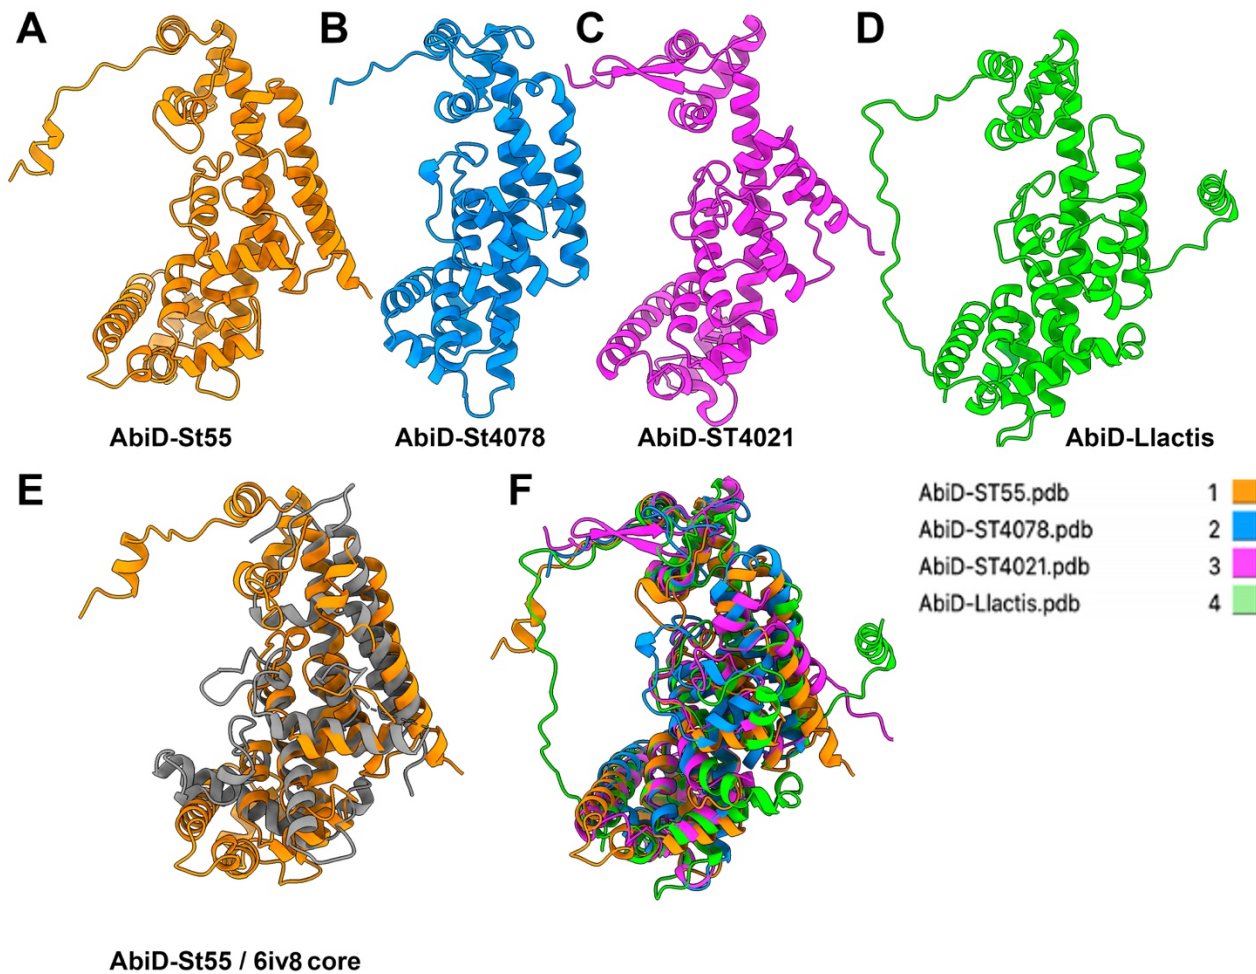

### Supplementary Figure S3:

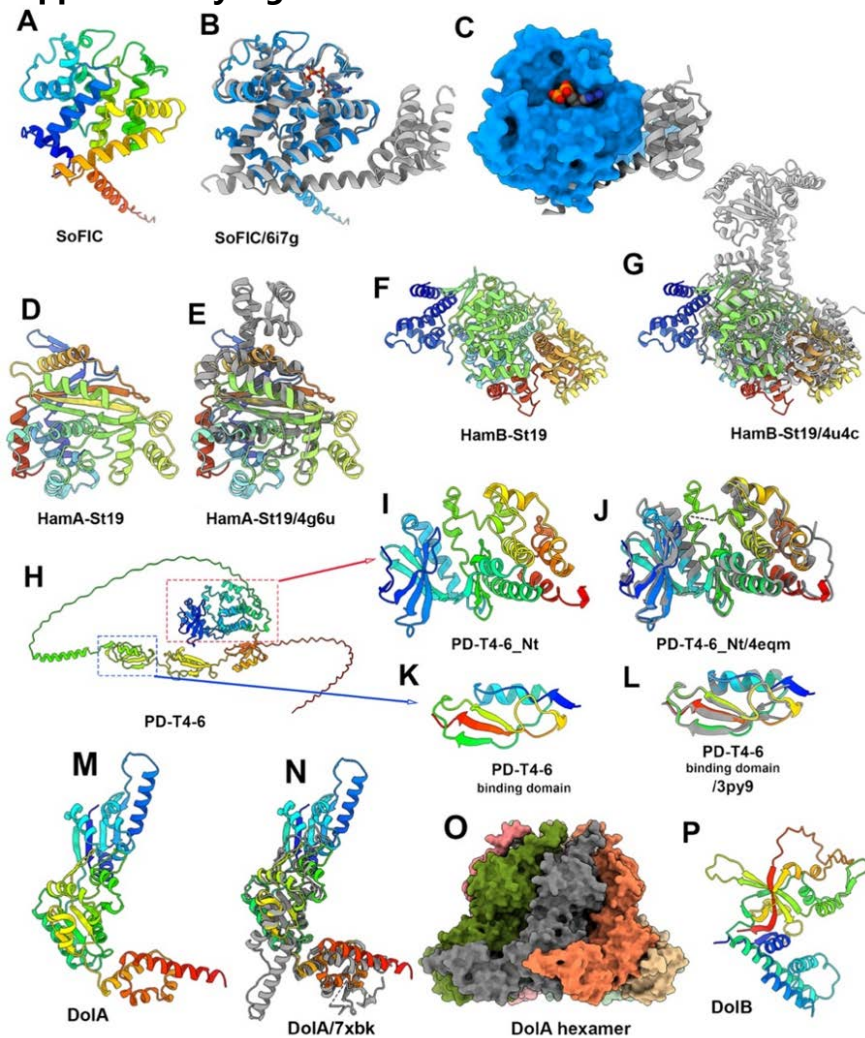

**Fig. S3.** Structure predictions of Sofic, Hachiman, PD-T4-6 and Dodola. **(A)** Ribbon structure of SoFIC (rainbow coloured); **(B)** Superimposition of SoFIC with PDB 6i7g (grey;  $Z=26.2$ ,  $rmsd = 1.8 \text{ \AA}$ ); **(C)** Molecular surface of SoFIC with the sphere model of 6i7g ATP inside its catalytic crevice. **(D)** Ribbon structure of HamA<sub>ST19</sub> (rainbow coloured); **(E)** Superimposition of HamA<sub>ST19</sub> with PDB 4g6u (grey;  $Z=5.5$ ,  $rmsd = 5.3 \text{ \AA}$ ), the EC869 toxin; **(F)** Ribbon structure of HamB<sub>ST19</sub> (rainbow coloured); **(G)** Superimposition of HamB<sub>ST19</sub> with PDB 4u4c (grey;  $Z=30.4$ ,  $rmsd = 3.7 \text{ \AA}$ ); **(H)** Ribbon structure of full-length PD-T4-6 (rainbow coloured); **(I)** N-terminal domain of PD-T4-6; **(J)** Superimposition of PD-T4-6-Nt with 4eqm (grey), a serine/threonine protein kinase; **(K)** structure of one of the three C-terminal domains; **(L)** Superimposition of one domain with 3py9, a binding domain; **(M)** Ribbon structure of DoIA (rainbow coloured); **(N)** Superimposition of DoIA with PDB 7xbk (grey;  $Z=21.2$ ,  $rmsd = 2.9 \text{ \AA}$ ); **(O)** Side-view of the molecular surface of the DoIA hexamer; **(P)** Ribbon structure of DoIB (rainbow coloured).



## Supplementary Figure S4:

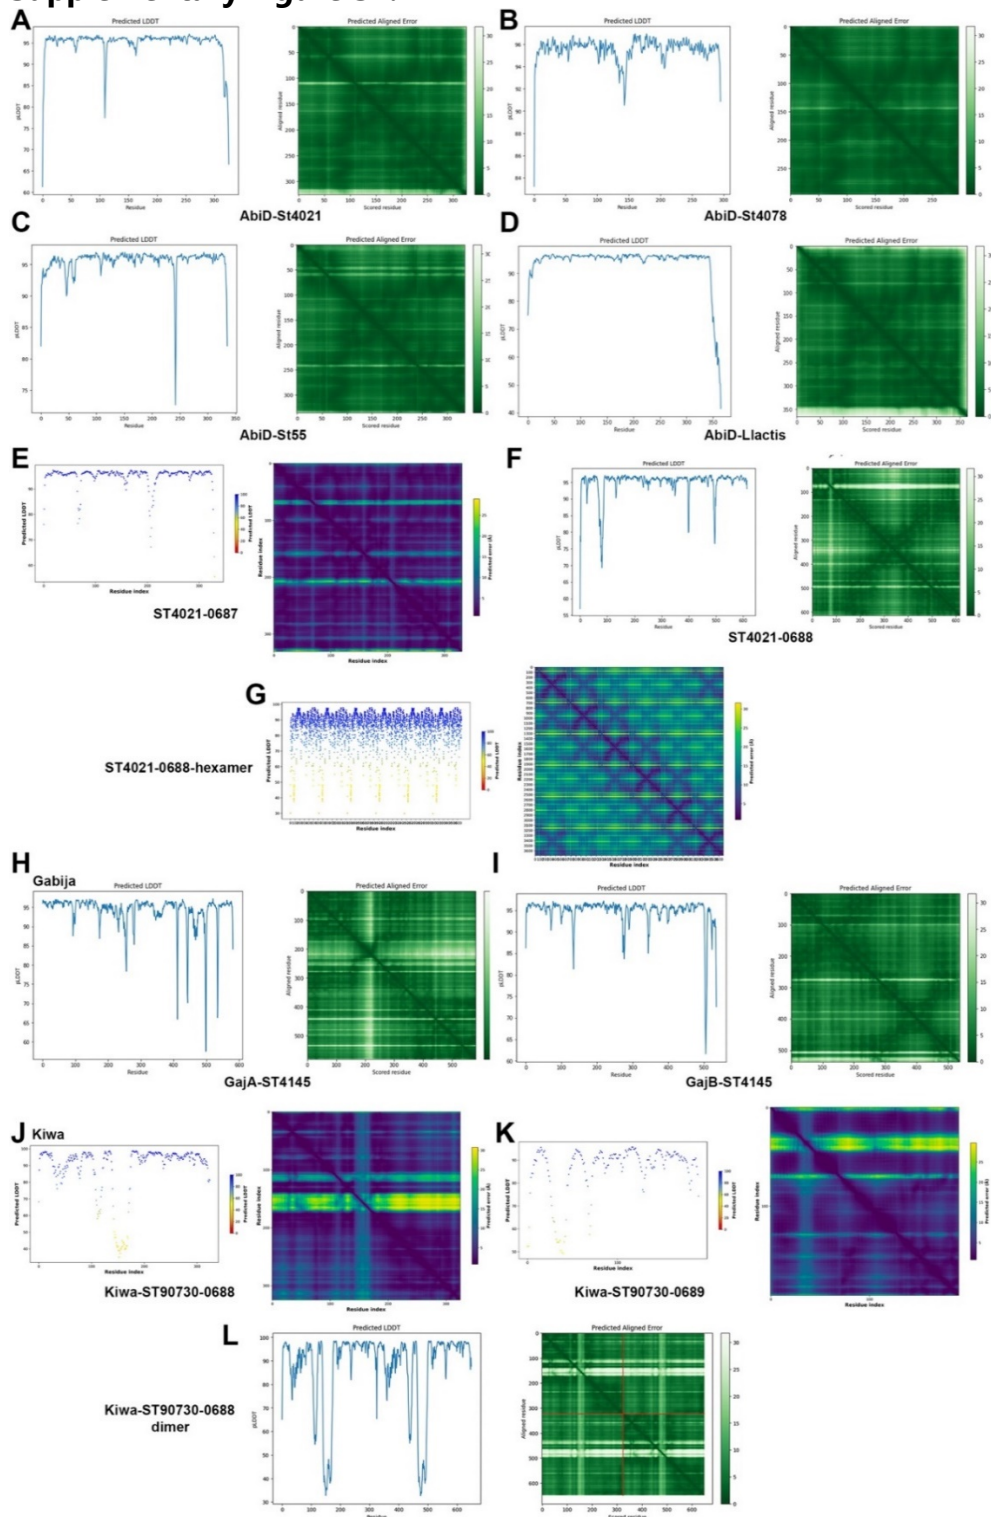

**Fig. S4. pLDDT values and predicted aligned errors (PAE) plots of predicted structures (Part 1)**

The pLDDT plots (left) and PAE plots (right) correspond to unique proteins or complexes. The pLDDT values (Y axis) are plotted for each residue (X axis). In PAE plots (residue number vs residue number) of complexes, the folded proteins or domains form squares along the diagonal while interactions between proteins or domains appear as squares at the vertical/horizontal intersection of the domains/proteins.

# Supplementary Figure 5: pLDDT values and predicted aligned errors (PAE) plots of predicted structures (Part 2)

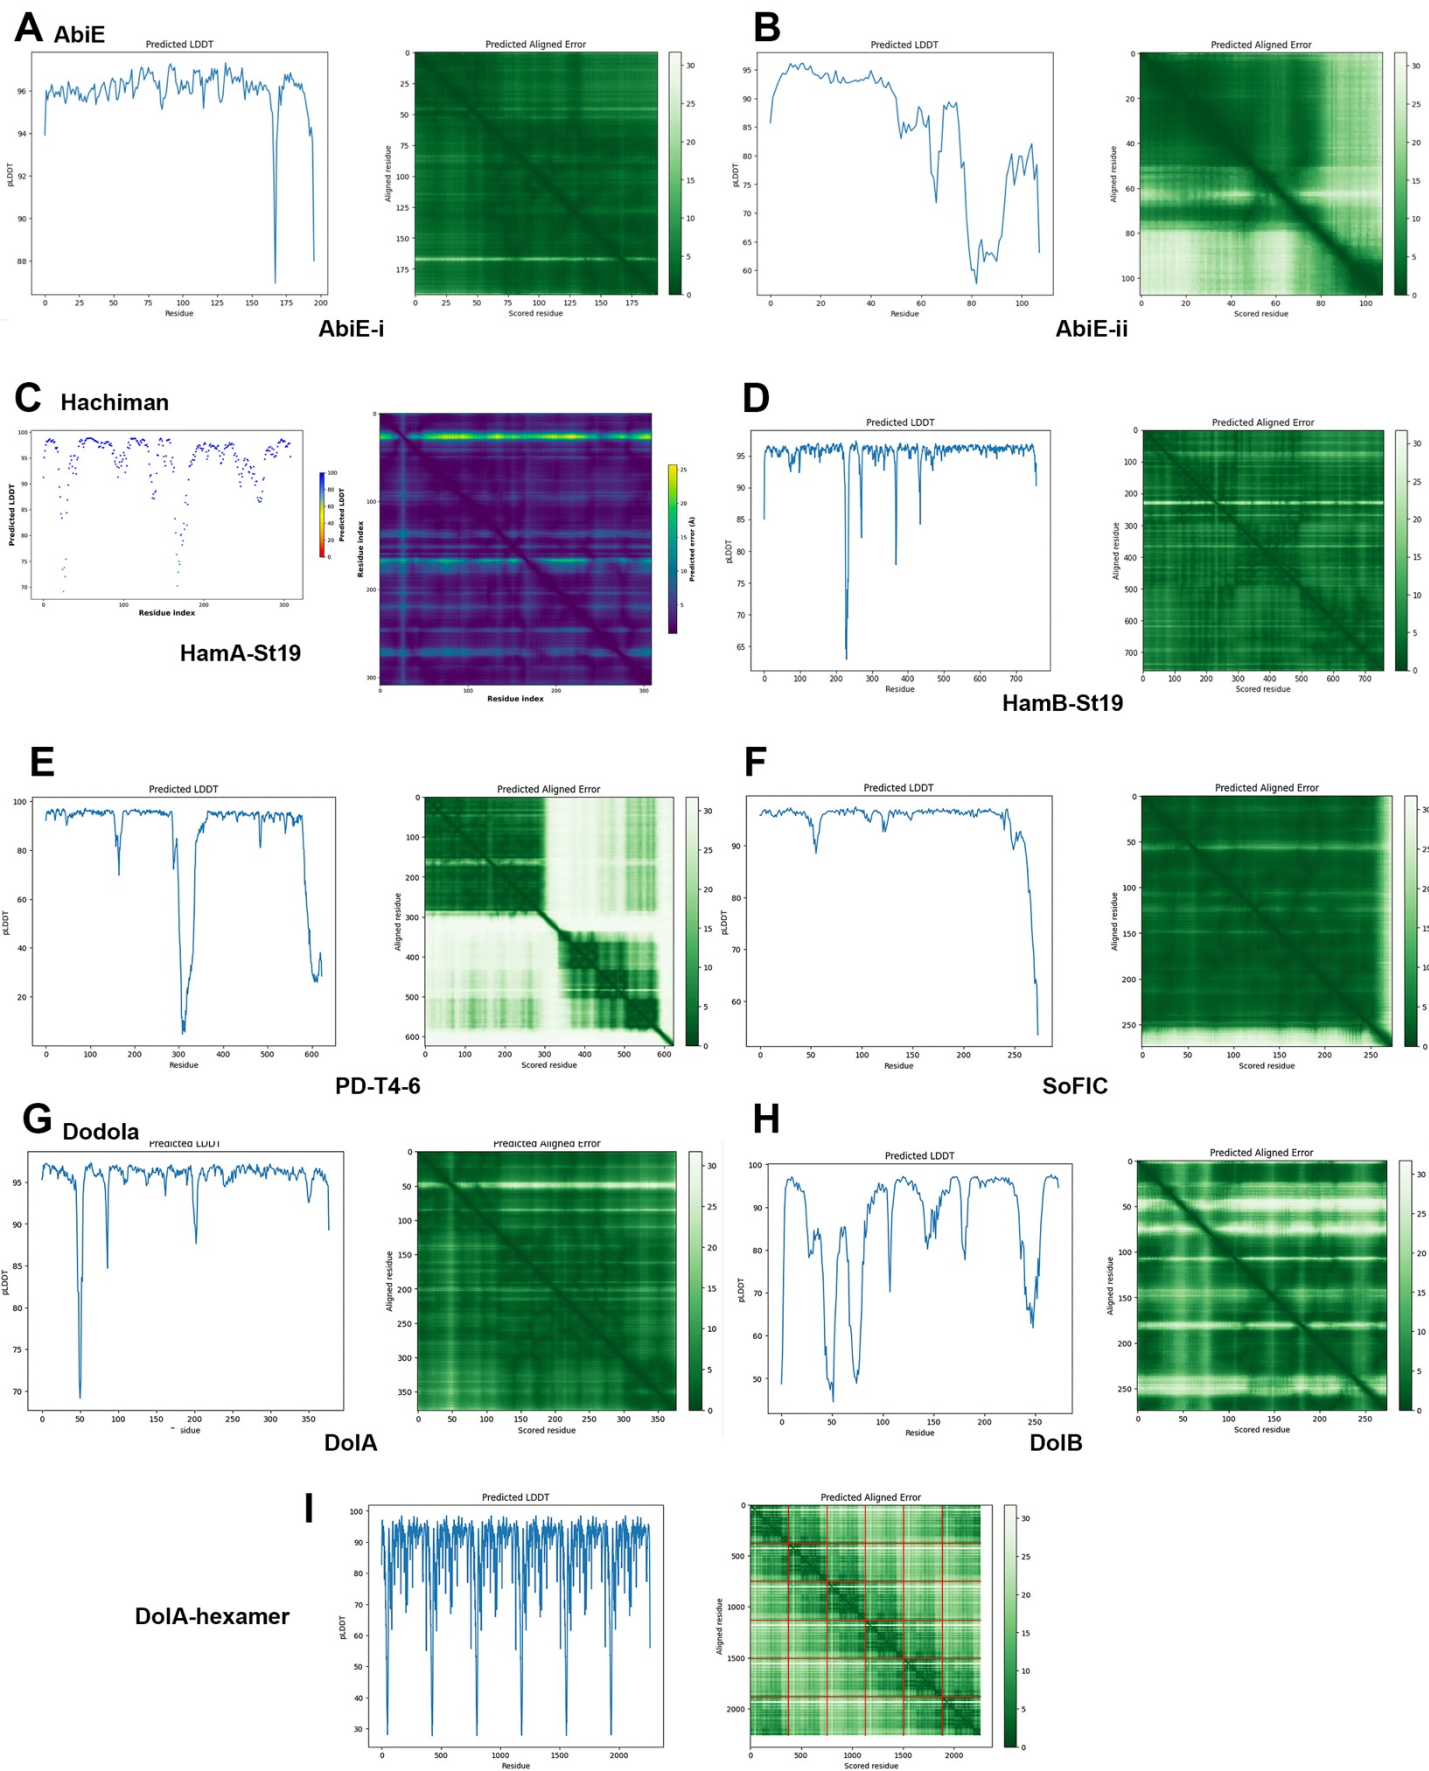

**Supplementary Table S1.** Oligonucleotides used in this study. These oligonucleotides were used to clone genes into pNZ44 and pPTPi and for PCR-based screening

| Oligonucleotide name                | Oligonucleotide sequence (5' → 3')                |
|-------------------------------------|---------------------------------------------------|
| <b>pPTPi<sup>+</sup> constructs</b> |                                                   |
| 4078_RM_FW                          | AGCAGCGTCGACAGGAGGCCACTCACCATGGTTTCTAGAAGAGAGTTTT |
| 4078_RM_RV                          | AGCAGCGCATGCCTACTCCACCTTCACCTG                    |
| ST1A_RM_FW                          | AGCAGCGGATCCAGGAGGCCACTCACCATGGCAAAAATTGAACCGAAAA |
| ST1A_RM_RV                          | AGCAGCGCATGCTCACTCATCCTCCTCGATT                   |
| MM1_RM_FW                           | AGCAGCGGATCCAGGAGGCCACTCACCATGAACGCTAGAAAACAGAAAA |
| MM1_RM_RV                           | AGCAGCGAATTCTTATTTAGCTAGAGCTTCATACA               |
| <b>pNZ44<sup>+</sup> constructs</b> |                                                   |
| PDT46_4078_FW                       | AAAAAACCATGGATGATCCAAGTTGGCAAATTG                 |
| PDT46_4078_RV                       | AAAAAAGAGCTCTTATTGCTCTGTGTGAGTAG                  |
| PDT46_4078_U_FW                     | AAAAAACCATGGGTTAACAGTCTGGTCTTGT                   |
| PDT46_4078_U_RV                     | AAAAAAGAGCTCCGCGTTCATCATAAAAGAATCT                |
| Sofic_MM20_FW                       | AAAAAACCATGGATGGATTTAATTACAAGACTTAAAG             |
| Sofic_MM20_RV                       | AAAAAAGAGCTCTTATAACGAAAAACCTTTTGTTTG              |
| Dodola_90729_FW                     | AAAAAAGGTACCTTGGCGGAAAATTTAAAAAATA                |
| Dodola_90729_RV                     | AAAAAAGAGCTCTTAGTTATGATTTTTATCGATTCTA             |
| AbiEi_90730_FW                      | AAAAAACCATGGCGAAAGGATAGTGCTATTATGAA               |
| AbiEi_90730_RV                      | AAAAAAGAGCTCTCCTAATCTCTCAATTCTTCAAG               |
| AbiEi_90730_U_FW                    | AAAAAACCATGGTCTAGAAGAGTTGGATGAAATG                |
| AbiEi_90730_U_RV                    | AAAAAAGAGCTCGGTTGGATTCAAGTAAAGAACAA               |
| Kiwa_90730_FW                       | AAAAAACCATGGGGAAAGAGGCATAAATTGATTC                |
| Kiwa_90730_RV                       | AAAAAAGAGCTCTGTTACCTATTTCTTTTAAAATG               |
| GAO_R1_FW                           | AAAAAACCATGGGTATTTTTAGGAGTTAATTATGGAA             |
| GAO_R1_RV                           | AAAAAAGAGCTCGTCTGGTTTCATTTGCCTC                   |
| Hach_ST19_FW                        | AAAAAACCATGGGAAAAGGAAAAGTAATATTGAGAA              |
| Hach_ST19_RV                        | AAAAAAGAGCTCCCGAGTCTTATCTTTTATTCAA                |
| AbiD_ST55_FW                        | AAAAAACCATGGAGGAGAGGTTACTGAATATTTTAA              |
| AbiD_ST55_RV                        | AAAAAAGAGCTCCCATTAATTCGTTTTTCGTCAT                |
| AbiD_ST55_U_FW                      | AAAAAACCATGGGATTTGTTAGCATATTGTTTTG                |
| AbiD_ST55_U_RV                      | AAAAAAGAGCTCAGGAGGACTGACGCATCA                    |
| GAO_4021_FW                         | AAAAAACCATGGCTTGAGGAATATACATATGGTTG               |
| GAO_4021_RV                         | AAAAAAGAGCTCTCAACTCCACAATTCAGTCAA                 |

|                                     |                                      |
|-------------------------------------|--------------------------------------|
| <b>AbiD_4021_FW</b>                 | AAAAAACCATGGTGTTAAGTGAGAATACTATGATTG |
| <b>AbiD_4021_RV</b>                 | AAAAAAGAGCTCTTATCTAGTCTCTGCGTTTC     |
| <b>AbiD_4021_U_FW</b>               | AAAAAACCATGGCGTGTGGTGTAAGAATGTTG     |
| <b>AbiD_4021_U_RV</b>               | AAAAAAGAGCTCCAGGCAAGAGACTAGCAC       |
| <b>AbiD_4078_FW</b>                 | AAAAAACCATGGAAGGGATTGCCATTATGCAAC    |
| <b>AbiD_4078_RV</b>                 | AAAAAAGAGCTCTATACGTTGTCAACTATTTTTTG  |
| <b>AbiD_4078_U_FW</b>               | AAAAAACCATGGGATGACAAAGCGATTTTTGAG    |
| <b>AbiD_4078_U_RV</b>               | AAAAAAGAGCTCCGAAATGATATAGAAAGAGTCG   |
| <b>Gabija_4145_FW</b>               | AAAAAACCATGGATTGGATAGGATAACTAATGAAAT |
| <b>Gabija_4145_RV</b>               | AAAAAAGAGCTCCCTTAGTTGTATAGGCATTATTA  |
| <b>Gabija_4145_U_FW</b>             | AAAAAACCATGGGGACAGGTGAAGGTATAAAAT    |
| <b>Gabija_4145_U_RV</b>             | AAAAAAGAGCTCACCTCTTGATAATTCAGAAC     |
| <b>Mutant construction</b>          |                                      |
| <b>034RM_1</b>                      | GAATTCCTGCAGCCCACTTGGATACTCGGTAAGAG  |
| <b>034RM_2</b>                      | CTAATGTACCTCATTCCATAGTTGCC           |
| <b>034RM_3</b>                      | TGGAAATGAGGTACATTAGAAGCTGGAGACG      |
| <b>034RM_4</b>                      | ACTAGTGGATCCCCAATCACCAAAACGTTGGTCTG  |
| <b>Screening/Sequencing primers</b> |                                      |
| <b>pPTPi_FW</b>                     | TGATTCGTTCGAAGGAACTA                 |
| <b>pPTPi_RV</b>                     | TGGCGGACAATAAGTCCTC                  |
| <b>pNZ44_FW</b>                     | CAATTGTAACCCATCCAGGA                 |
| <b>pNZ44_RV</b>                     | TGGCTATCAATCAAAGCAACA                |
| <b>4078_RM_Seq_1</b>                | TCACTCTATCAAAGGAAAGAC                |
| <b>4078_RM_Seq_2</b>                | GTCATCCACGTTATGTCTCAC                |
| <b>4078_RM_Seq_3</b>                | ATCGACGAAGTGAGGGATAGAC               |
| <b>4078_RM_Seq_4</b>                | TCTTACCCATGCTGGTCTAGG                |
| <b>4078_RM_Seq_5</b>                | CTATCATCGTAATCGCCATCC                |
| <b>4078_RM_Seq_6</b>                | GCATTGGAGCAGGAGATTGAAG               |
| <b>4078_RM_Seq_7</b>                | TCCCAGACCAGAATGCCAAACC               |
| <b>ST1A_RM_Seq_1</b>                | CCGCGAGTTACTTACTGATG                 |
| <b>ST1A_RM_Seq_2</b>                | TGGAACCTTCGTCGGTGAAC                 |
| <b>ST1A_RM_Seq_3</b>                | CGTCCGTGACTTAATCTCTG                 |
| <b>ST1A_RM_Seq_4</b>                | TGCCCGTGATGATAAGGAAC                 |
| <b>ST1A_RM_Seq_5</b>                | CGTGGTGCAAGGTATTATCC                 |
| <b>ST1A_RM_Seq_6</b>                | CACGGCAAACCTCTTGAATG                 |

|                      |                                 |
|----------------------|---------------------------------|
| <b>MM1_RM_Seq_1</b>  | CAATGGTGGGATGTTCTCTG            |
| <b>MM1_RM_Seq_2</b>  | GCAAGGAGAACAGGCAAGTC            |
| <b>MM1_RM_Seq_3</b>  | AAGACCGATGGACGTTATGG            |
| <b>GAO_R1_1</b>      | CATGGTTCGATTA <u>ACTGGACTTC</u> |
| <b>GAO_R1_2</b>      | GGA <u>ACTATCCAGAATAAGTATGA</u> |
| <b>Hach_ST19_1</b>   | TGCTTTTACCAGTTGGT <u>GATTCT</u> |
| <b>Hach_ST19_2</b>   | TCAAAAACCAGAACTAGAGTAA          |
| <b>GAO_4021_1</b>    | ATCCAAGAAATCTGAATGCATTA         |
| <b>GAO_4021_2</b>    | GATAAACTTCCAATAACTTCAGA         |
| <b>Gabija_4145_1</b> | CGAGGAGCCAGAAAACAGTC            |
| <b>Gabija_4145_2</b> | AGTGATCAGAAAATTAGGAATGA         |
| <b>pGH9L</b>         | TGGTACAGCTGAAGTTGTTG            |
| <b>pGH9R</b>         | GTATACTACTGACAGCTTCC            |
| <b>034RMdeLL</b>     | CTCCAAGAACTTTGCTTCTG            |
| <b>034RMdeLR</b>     | CCATTGTGTCGCTTGTATTG            |

ψ Introduced restriction enzyme sites are singly underlined, Shine-Dalgarno sequences are doubly underlined.



**Supplementary Table S2.** Details of plasmids associated with analysed strains

| <i>S. thermophilus</i><br>strain | Plasmid<br>name | Size (kb) | # predicted<br>ORFs | Identified phage-<br>resistance systems |
|----------------------------------|-----------------|-----------|---------------------|-----------------------------------------|
| ST1A                             | p1AA            | 3.529     | 2                   |                                         |
| 4021                             | p4021A          | 3.529     | 2                   |                                         |
| 4067                             | p4067A          | 3.385     | 3                   |                                         |
| 4147                             | p4147A          | 5.802     | 4                   |                                         |
| AVA116                           | pAVA116A        | 5.430     | 5                   |                                         |
| CNRZ1202                         | pCNRZ1202A      | 7.493     | 7                   | Type II R/M                             |
|                                  | pCNRZ1202B      | 5.728     | 5                   |                                         |
| ST55                             | pST55A          | 5.175     | 5                   |                                         |
| ST128                            | pST128A         | 8.145     | 6                   |                                         |

**Supplementary Table S3: Type I Active Systems (32)**

| <b>Organism</b>                             | <b>Enzyme</b> | <b>Rec seq (meth base/type)</b> |
|---------------------------------------------|---------------|---------------------------------|
| <i>Streptococcus thermophilus</i> 4021      | M.Sth4021I    | GCANNNNNNNNTCG                  |
| <i>Streptococcus thermophilus</i> 4052      | M.Sth4052I    | CGANNNNNNNTGA                   |
| <i>Streptococcus thermophilus</i> 4078      | M.Sth4078I    | CCAYNNNNNNTGA                   |
| <i>Streptococcus thermophilus</i> 4134      | M.Sth4134I    | TGANNNNNNNNTYTC                 |
|                                             | M.Sth4134II   | GCANNNNNNNCTAR                  |
| <i>Streptococcus thermophilus</i> 4145      | M.Sth4145I    | GGANNNNNNRTTG                   |
| <i>Streptococcus thermophilus</i> 4147      | M.Sth4147I    | GAAYNNNNNNNTAYG                 |
| <i>Streptococcus thermophilus</i> 90728     | M.Sth90728I   | YTCANNNNNNNTGC                  |
| <i>Streptococcus thermophilus</i> 90729     | M.Sth90729I   | GGANNNNNNNNTCG                  |
| <i>Streptococcus thermophilus</i> 90730     | M.Sth90730I   | CGANNNNNNNTAC                   |
| <i>Streptococcus thermophilus</i> AVA1121   | M.Sth1121I    | GNAAYNNNNNNNTAYC                |
|                                             | M.Sth1121II   | CAACNNNNNNTCA                   |
| <i>Streptococcus thermophilus</i> AVA116    | M.Sth116I     | GAAYNNNNNNCTAR                  |
|                                             | M.Sth116III   | CCANNNNNNNNTCG                  |
| <i>Streptococcus thermophilus</i> CNRZ1202  | M.Sth1202I    | CACNNNNNNRTGA                   |
| <i>Streptococcus thermophilus</i> CNRZ1575  | M.Sth1575I    | ACGNNNNNNNNTAYC                 |
|                                             | M.Sth1575II   | GGANNNNNNNTGG                   |
| <i>Streptococcus thermophilus</i> CNRZ302   | M.SthZ302I    | GGANNNNNNNTGC                   |
| <i>Streptococcus thermophilus</i> CNRZ385   | M.Sth385I     | TACBNNNNNNNTGC                  |
| <i>Streptococcus thermophilus</i> CNRZ760   | M.Sth760I     | GACNNNNNNTGC                    |
|                                             | M.Sth760II    | CRTANNNNNNAGT                   |
| <i>Streptococcus thermophilus</i> CNRZ887   | M.Sth887I     | CRTANNNNNNATC                   |
| <i>Streptococcus thermophilus</i> MM1       | M.SthMM1I     | GGANNNNNNNTCC                   |
| <i>Streptococcus thermophilus</i> MM20      | M.SthMM20I    | GGANNNNNNNTAC                   |
| <i>Streptococcus thermophilus</i> R1        | M.SthR1II     | GATTNNNNNNNTCG                  |
| <i>Streptococcus thermophilus</i> ST128     | M.Sth128I     | ACGNNNNNNNNTAYC                 |
|                                             | M.Sth128II    | GGANNNNNNNTAC                   |
| <i>Streptococcus thermophilus</i> ST19      | M.Sth19I      | GGANNNNNNNNTAAT                 |
|                                             | M.Sth19II     | TGANNNNNNNVTTG                  |
| <i>Streptococcus thermophilus</i> ST55      | M.Sth55I      | TCTANNNNNNNNTAGY                |
| <i>Streptococcus thermophilus</i> strain 1A | M.Sth1AI      | CRTANNNNNNTGG                   |
| <i>Streptococcus thermophilus</i> UCCSt95   | M.Sth95I      | GGANNNNNNNTGG                   |

**Supplementary Table S4: Type II Active Systems (11)**

| Organism                                   | Enzyme       | Rec seq (meth base/type) |
|--------------------------------------------|--------------|--------------------------|
| <i>Streptococcus thermophilus</i> 90730    | Sth90730II   | CAGAG                    |
| <i>Streptococcus thermophilus</i> CNRZ1151 | Sth1151I     | CAGAG                    |
| <i>Streptococcus thermophilus</i> CNRZ1202 | M.Sth1202II  | GATC                     |
| <i>Streptococcus thermophilus</i> CNRZ887  | M.Sth887II   | CAGAG                    |
|                                            | Sth887II     | CAGAG                    |
| <i>Streptococcus thermophilus</i> MM1      | SthMM1II     | CAGRAG                   |
| <i>Streptococcus thermophilus</i> MM20     | M.SthMM20III | GAAGT                    |
|                                            | SthMM20III   | GAAGT <sub>m6A</sub>     |
| <i>Streptococcus thermophilus</i> R1       | M.SthR1I     | GAAGT                    |
|                                            | SthR1I       | GAAGT                    |
| <i>Streptococcus thermophilus</i> ST55     | Sth55II      | CAGRAG                   |

**Supplementary Table S5: Type III active Systems (6)**

| Organism                                    | Enzyme      | Rec seq (meth base/type) |
|---------------------------------------------|-------------|--------------------------|
| <i>Streptococcus thermophilus</i> AVA116    | M.Sth116II  | CGANAG                   |
| <i>Streptococcus thermophilus</i> CNRZ302   | M.SthZ302II | CGCAT                    |
| <i>Streptococcus thermophilus</i> MM20      | M.SthMM20II | CGCAT                    |
| <i>Streptococcus thermophilus</i> strain 1A | M.Sth1AII   | CGWAAT                   |
| <i>Streptococcus thermophilus</i> UCCSt95   | M.Sth95II   | CGCAT                    |
|                                             | M.Sth95III  | ACAGC                    |

**Supplementary Table S6: Type I Inactive Systems (46)**

| Organism                               | Enzyme             | Rec seq (meth base/type) |
|----------------------------------------|--------------------|--------------------------|
| <i>Streptococcus thermophilus</i> 4052 | M.Sth4052ORF4065P  | - m6A                    |
| <i>Streptococcus thermophilus</i> 4067 | M1.Sth4067ORF4200P | - m6A                    |
|                                        | M2.Sth4067ORF4200P | - m6A                    |
| <i>Streptococcus thermophilus</i> 4134 | M1.Sth4134ORF4310P | - m6A                    |
|                                        | M2.Sth4134ORF4310P | - m6A                    |
| <i>Streptococcus thermophilus</i> 4145 | M1.Sth4145ORF4170P | - m6A                    |
|                                        | M2.Sth4145ORF4170P | - m6A                    |
| <i>Streptococcus thermophilus</i> 4147 | M1.Sth4147ORF4210P | - m6A                    |
|                                        | M2.Sth4147ORF4210P | - m6A                    |

|                                             |                     |                     |
|---------------------------------------------|---------------------|---------------------|
| <i>Streptococcus thermophilus</i> 90728     | M1.Sth90728ORF4395P | - m6A               |
|                                             | M2.Sth90728ORF4395P | - m6A               |
| <i>Streptococcus thermophilus</i> 90729     | M1.Sth90729ORF4435P | - m6A               |
|                                             | M2.Sth90729ORF4435P | - m6A               |
| <i>Streptococcus thermophilus</i> 90730     | M1.Sth90730ORF4170P | - m6A               |
|                                             | M2.Sth90730ORF4170P | - m6A               |
| <i>Streptococcus thermophilus</i> AVA1121   | M1.Sth1121ORF4175P  | - m6A               |
|                                             | M2.Sth1121ORF4175P  | - m6A               |
| <i>Streptococcus thermophilus</i> AVA116    | M1.Sth116ORF4030P   | - m6A               |
|                                             | M2.Sth116ORF4030P   | - m6A               |
| <i>Streptococcus thermophilus</i> CNRZ1151  | M.Sth1151ORF3645P   | GNNTAYNNNNNNTGC m6A |
|                                             | M1.Sth1151ORF4190P  | - m6A               |
|                                             | M2.Sth1151ORF4190P  | - m6A               |
| <i>Streptococcus thermophilus</i> CNRZ1202  | M1.Sth1202ORF4140P  | - m6A               |
|                                             | M2.Sth1202ORF4140P  | - m6A               |
| <i>Streptococcus thermophilus</i> CNRZ1575  | M1.Sth1575ORF4310P  | - m6A               |
|                                             | M2.Sth1575ORF4310P  | - m6A               |
| <i>Streptococcus thermophilus</i> CNRZ302   | M1.SthZ302ORF4280P  | - m6A               |
|                                             | M2.SthZ302ORF4280P  | - m6A               |
| <i>Streptococcus thermophilus</i> CNRZ385   | M.Sth385ORF4285P    | - m6A               |
| <i>Streptococcus thermophilus</i> CNRZ760   | M1.Sth760ORF4425P   | - m6A               |
|                                             | M2.Sth760ORF4425P   | - m6A               |
| <i>Streptococcus thermophilus</i> CNRZ887   | M1.Sth887ORF4110P   | - m6A               |
|                                             | M2.Sth887ORF4110P   | - m6A               |
| <i>Streptococcus thermophilus</i> MM1       | M.SthMM1ORF5195P    | - m6A               |
| <i>Streptococcus thermophilus</i> MM20      | M.SthMM20ORF5900P   | - m6A               |
| <i>Streptococcus thermophilus</i> R1        | M1.SthR1ORF4325P    | - m6A               |
|                                             | M2.SthR1ORF4325P    | - m6A               |
| <i>Streptococcus thermophilus</i> ST128     | M1.Sth128ORF4290P   | - m6A               |
|                                             | M2.Sth128ORF4290P   | - m6A               |
| <i>Streptococcus thermophilus</i> ST19      | M.Sth19ORF4280P     | - m6A               |
| <i>Streptococcus thermophilus</i> ST55      | M1.Sth55ORF4365P    | - m6A               |
|                                             | M2.Sth55ORF4365P    | - m6A               |
| <i>Streptococcus thermophilus</i> strain 1A | M1.Sth1AORF4285P    | - m6A               |
|                                             | M2.Sth1AORF4285P    | - m6A               |
| <i>Streptococcus thermophilus</i> UCCSt95   | M1.Sth95ORF4165P    | - m6A               |
|                                             | M2.Sth95ORF4165P    | - m6A               |

**Supplementary Table S7: Type II Inactive Systems (49)**

| Organism                               | Enzyme            | Rec seq (meth base/type) |
|----------------------------------------|-------------------|--------------------------|
| <i>Streptococcus thermophilus</i> 4021 | M.Sth4021ORF3410P | -                        |
|                                        | M.Sth4021ORF3535P | GCSGC m5C                |

|                                             |                    |            |
|---------------------------------------------|--------------------|------------|
| <i>Streptococcus thermophilus</i> 4052      | M.Sth4052ORF3335P  | -          |
| <i>Streptococcus thermophilus</i> 4067      | M.Sth4067ORF3440P  | -          |
|                                             | M.Sth4067ORF7395P  | GATC m5C   |
| <i>Streptococcus thermophilus</i> 4078      | M.Sth4078ORF3405P  | -          |
|                                             | M.Sth4078ORF3530P  | GATC m5C   |
|                                             | M.Sth4078ORF9015P  | - m5C      |
| <i>Streptococcus thermophilus</i> 4145      | M.Sth4145ORF3315P  | -          |
|                                             | M.Sth4145ORF3445P  | GATC m5C   |
|                                             | M.Sth4145ORF8840P  | - m5C      |
| <i>Streptococcus thermophilus</i> 4147      | M.Sth4147ORF3375P  | -          |
| <i>Streptococcus thermophilus</i> 90728     | M.Sth90728ORF3310P | - m5C      |
|                                             | M.Sth90728ORF3570P | -          |
| <i>Streptococcus thermophilus</i> 90729     | M.Sth90729ORF3330P | - m5C      |
|                                             | M.Sth90729ORF3590P | -          |
|                                             | M.Sth90729ORF8980P | GATC m5C   |
| <i>Streptococcus thermophilus</i> 90730     | M.Sth90730ORF3335P | -          |
|                                             | M.Sth90730ORF6370P | CAGAG      |
| <i>Streptococcus thermophilus</i> AVA1121   | M.Sth1121ORF3350P  | -          |
| <i>Streptococcus thermophilus</i> AVA116    | M.Sth116ORF3260P   | -          |
| <i>Streptococcus thermophilus</i> CNRZ1151  | M.Sth1151ORF3340P  | -          |
|                                             | M.Sth1151ORF6445P  | GAAGT      |
| <i>Streptococcus thermophilus</i> CNRZ1202  | M.Sth1202ORF3400P  | -          |
| <i>Streptococcus thermophilus</i> CNRZ1575  | M.Sth1575ORF3505P  | -          |
|                                             | Sth1575ORF2800P    | GCAAAT m6A |
| <i>Streptococcus thermophilus</i> CNRZ302   | M.SthZ302ORF3430P  | -          |
|                                             | M.SthZ302ORF3555P  | GATC m5C   |
|                                             | M.SthZ302ORF3925P  | - m5C      |
|                                             | M.SthZ302ORF9005P  | - m5C      |
| <i>Streptococcus thermophilus</i> CNRZ385   | M.Sth385ORF3460P   | -          |
|                                             | M1.Sth385ORF9165P  | - m5C      |
|                                             | M2.Sth385ORF9165P  | - m5C      |
| <i>Streptococcus thermophilus</i> CNRZ760   | M.Sth760ORF3355P   | - m5C      |
|                                             | M.Sth760ORF3665P   | -          |
|                                             | M.Sth760ORF7710P   | - m5C      |
| <i>Streptococcus thermophilus</i> CNRZ887   | M.Sth887ORF3325P   | -          |
| <i>Streptococcus thermophilus</i> MM20      | M.SthMM20ORF6685P  | -          |
|                                             | SthMM20ORF7340P    | GCAAAT m6A |
| <i>Streptococcus thermophilus</i> R1        | M.SthR1ORF3345P    | -          |
| <i>Streptococcus thermophilus</i> ST128     | M.Sth128ORF3545P   | -          |
| <i>Streptococcus thermophilus</i> ST19      | M.Sth19ORF2475P    | - m5C      |
|                                             | M.Sth19ORF3425P    | -          |
| <i>Streptococcus thermophilus</i> ST55      | M.Sth55ORF3310P    | - m5C      |
|                                             | M.Sth55ORF3590P    | -          |
|                                             | M.Sth55ORF3715P    | - m5C      |
| <i>Streptococcus thermophilus</i> strain 1A | M.Sth1AORF3395P    | -          |
|                                             | M.Sth1AORF3520P    | GCSGC m5C  |
| <i>Streptococcus thermophilus</i> UCCSt95   | M.Sth95ORF3370P    | -          |



**Supplementary Table S8: M5C methylase genes (20)**

| Organism                                    | Enzyme             | Recognition Sequence |
|---------------------------------------------|--------------------|----------------------|
| <i>Streptococcus thermophilus</i> 4021      | M.Sth4021ORF3535P  | GCSGC                |
| <i>Streptococcus thermophilus</i> 4067      | M.Sth4067ORF7395P  | GATC                 |
| <i>Streptococcus thermophilus</i> 4078      | M.Sth4078ORF3530P  | GATC                 |
|                                             | M.Sth4078ORF9015P  | -                    |
| <i>Streptococcus thermophilus</i> 4145      | M.Sth4145ORF3445P  | GATC                 |
|                                             | M.Sth4145ORF8840P  | -                    |
| <i>Streptococcus thermophilus</i> 90728     | M.Sth90728ORF3310P | -                    |
| <i>Streptococcus thermophilus</i> 90729     | M.Sth90729ORF3330P | -                    |
|                                             | M.Sth90729ORF8980P | GATC                 |
| <i>Streptococcus thermophilus</i> CNRZ302   | M.SthZ302ORF3555P  | GATC                 |
|                                             | M.SthZ302ORF3925P  | -                    |
|                                             | M.SthZ302ORF9005P  | -                    |
| <i>Streptococcus thermophilus</i> CNRZ385   | M1.Sth385ORF9165P  | -                    |
|                                             | M2.Sth385ORF9165P  | -                    |
| <i>Streptococcus thermophilus</i> CNRZ760   | M.Sth760ORF3355P   | -                    |
|                                             | M.Sth760ORF7710P   | -                    |
| <i>Streptococcus thermophilus</i> ST19      | M.Sth19ORF2475P    | -                    |
| <i>Streptococcus thermophilus</i> ST55      | M.Sth55ORF3310P    | -                    |
|                                             | M.Sth55ORF3715P    | -                    |
| <i>Streptococcus thermophilus</i> strain 1A | M.Sth1AORF3520P    | GCSGC                |

**Supplementary Table S9: Type III Inactive Systems (8)**

| Organism                                | Enzyme             | Rec seq (meth base/type) |
|-----------------------------------------|--------------------|--------------------------|
| <i>Streptococcus thermophilus</i> 4052  | M.Sth4052ORF4190P  | CGCAT m6A                |
| <i>Streptococcus thermophilus</i> 4145  | M.Sth4145ORF4280P  | CGWAAT m6A               |
| <i>Streptococcus thermophilus</i> 4147  | M.Sth4147ORF4330P  | CGCAT m6A                |
| <i>Streptococcus thermophilus</i> 90728 | M.Sth90728ORF4495P | CGCAT m6A                |
| <i>Streptococcus thermophilus</i> 90729 | M.Sth90729ORF4565P | CGCAT m6A                |

|                                            |                    |                           |
|--------------------------------------------|--------------------|---------------------------|
| <i>Streptococcus thermophilus</i> 90730    | M.Sth90730ORF4290P | CGCAT <a href="#">m6A</a> |
| <i>Streptococcus thermophilus</i> CNRZ1151 | M.Sth1151ORF4310P  | CGCAT <a href="#">m6A</a> |
| <i>Streptococcus thermophilus</i> CNRZ887  | M.Sth887ORF4230P   | CGCAT <a href="#">m6A</a> |

**Supplementary Table S10: Type IV Systems (Unknown activity) (18)**

| Organism                                   | Enzyme           | Rec seq (meth base/type) |
|--------------------------------------------|------------------|--------------------------|
| <i>Streptococcus thermophilus</i> 4052     | Sth4052ORF3465P  | -                        |
| <i>Streptococcus thermophilus</i> 4067     | Sth4067ORF3570P  | -                        |
| <i>Streptococcus thermophilus</i> 4134     | Sth4134ORF3555P  | -                        |
| <i>Streptococcus thermophilus</i> 90728    | Sth90728ORF3700P | -                        |
| <i>Streptococcus thermophilus</i> 90729    | Sth90729ORF3720P | -                        |
| <i>Streptococcus thermophilus</i> AVA1121  | Sth1121ORF3480P  | -                        |
| <i>Streptococcus thermophilus</i> AVA116   | Sth116ORF3390P   | -                        |
| <i>Streptococcus thermophilus</i> CNRZ1202 | Sth1202ORF3540P  | -                        |
| <i>Streptococcus thermophilus</i> CNRZ1575 | Sth1575ORF3640P  | -                        |
| <i>Streptococcus thermophilus</i> CNRZ385  | Sth385ORF3595P   | -                        |
| <i>Streptococcus thermophilus</i> CNRZ760  | Sth760ORF3800P   | -                        |
| <i>Streptococcus thermophilus</i> CNRZ887  | Sth887ORF3455P   | -                        |
| <i>Streptococcus thermophilus</i> MM1      | SthMM1ORF3610P   | -                        |
| <i>Streptococcus thermophilus</i> MM20     | SthMM20ORF6555P  | -                        |
| <i>Streptococcus thermophilus</i> R1       | SthR1ORF3475P    | -                        |
| <i>Streptococcus thermophilus</i> ST128    | Sth128ORF3675P   | -                        |
| <i>Streptococcus thermophilus</i> ST19     | Sth19ORF3555P    | -                        |
| <i>Streptococcus thermophilus</i> UCCSt95  | Sth95ORF3505P    | -                        |

**Supplementary Table S11: Systems recognizing CGCAT (10)**

| Organism                                   | Enzyme             | Rec seq (meth base/type)  |
|--------------------------------------------|--------------------|---------------------------|
| <i>Streptococcus thermophilus</i> 4052     | M.Sth4052ORF4190P  | CGCAT <a href="#">m6A</a> |
| <i>Streptococcus thermophilus</i> 4147     | M.Sth4147ORF4330P  | CGCAT <a href="#">m6A</a> |
| <i>Streptococcus thermophilus</i> 90728    | M.Sth90728ORF4495P | CGCAT <a href="#">m6A</a> |
| <i>Streptococcus thermophilus</i> 90729    | M.Sth90729ORF4565P | CGCAT <a href="#">m6A</a> |
| <i>Streptococcus thermophilus</i> 90730    | M.Sth90730ORF4290P | CGCAT <a href="#">m6A</a> |
| <i>Streptococcus thermophilus</i> CNRZ1151 | M.Sth1151ORF4310P  | CGCAT <a href="#">m6A</a> |
| <i>Streptococcus thermophilus</i> CNRZ302  | M.SthZ302II        | CGCAT                     |
| <i>Streptococcus thermophilus</i> CNRZ887  | M.Sth887ORF4230P   | CGCAT <a href="#">m6A</a> |
| <i>Streptococcus thermophilus</i> MM20     | M.SthMM20II        | CGCAT                     |
| <i>Streptococcus thermophilus</i> UCCSt95  | M.Sth95II          | CGCAT                     |

**Supplementary Table S12.** Efficiency of plaquing (EOP) of lactococcal phages in the presence or absence of Type I, Type II or Type III R/M systems

| <b>VES7862<br/>pPTPi<br/>derivative</b> | <b>sk1</b>                                  | <b>c2</b>                                   | <b>p2</b>                                   | <b>jj50</b>                                 | <b>712</b>                                  | <b>62606</b>                                |
|-----------------------------------------|---------------------------------------------|---------------------------------------------|---------------------------------------------|---------------------------------------------|---------------------------------------------|---------------------------------------------|
| Empty vector control                    | 1                                           | 1                                           | 1                                           | 1                                           | 1                                           | 1                                           |
| 4078_RM I<br>Uninduced                  | 1.07 ± 0.12                                 | 1.02 ± 0.05                                 | 1.14 ± 0.06                                 | 1.11 ± 0.12                                 | 0.96 ± 0.08                                 | 1.10 ± 0.11                                 |
| 4078_RM I<br>Induced                    | $4.0 \times 10^{-5} \pm 1.1 \times 10^{-5}$ | $6.8 \times 10^{-4} \pm 1.2 \times 10^{-4}$ | $2.6 \times 10^{-5} \pm 9.5 \times 10^{-6}$ | $5.1 \times 10^{-5} \pm 5.3 \times 10^{-6}$ | $5.9 \times 10^{-4} \pm 1.7 \times 10^{-4}$ | $1.0 \times 10^{-3} \pm 2.9 \times 10^{-4}$ |
| MM1_RM II<br>Uninduced                  | 1.11 ± 0.20                                 | 0.92 ± 0.10                                 | 1.27 ± 0.19                                 | 1.11 ± 0.11                                 | 0.92 ± 0.08                                 | 0.92 ± 0.10                                 |
| MM1_RM II<br>Induced                    | $2.1 \times 10^{-4} \pm 5.5 \times 10^{-5}$ | $6.1 \times 10^{-3} \pm 5.9 \times 10^{-4}$ | $1.1 \times 10^{-4} \pm 3.1 \times 10^{-5}$ | $5.4 \times 10^{-4} \pm 1.6 \times 10^{-4}$ | $9.7 \times 10^{-4} \pm 1.8 \times 10^{-4}$ | $1.6 \times 10^{-3} \pm 4.1 \times 10^{-4}$ |
| ST95_RM III<br>Uninduced                | 1.06 ± 0.09                                 | 0.99 ± 0.07                                 | 1.03 ± 0.07                                 | 1.11 ± 0.12                                 | 0.97 ± 0.11                                 | 0.84 ± 0.12                                 |
| ST95_RM III<br>Induced                  | $1.1 \times 10^{-4} \pm 3.1 \times 10^{-5}$ | $9.4 \times 10^{-4} \pm 7.8 \times 10^{-5}$ | $1.6 \times 10^{-5} \pm 4.8 \times 10^{-6}$ | $3.8 \times 10^{-5} \pm 1.1 \times 10^{-5}$ | $6.3 \times 10^{-4} \pm 6.7 \times 10^{-5}$ | $3.2 \times 10^{-4} \pm 8.4 \times 10^{-5}$ |

**Supplementary Table S13.** Efficiency of plaquing of representative *S. thermophilus* and *L. cremoris* phages on strains harbouring constructs expressing predicted phage-resistance systems. Phages SW13 (*Brussowvirus*), STP1 (*Moineauvirus*), SW16 (987 group), P738 (P738 group), sk1 (*Skunavirus*) and c2 (*Ceduovirus*) were used in these assays. Blue boxes represent those where a reduction in plaque size was observed. Presented data are the average of (at least) triplicate assays.

| Predicted anti-phage system_source strain | Plaquing efficiency of:                 |                 |                                             |                                              |                                               |                                               |
|-------------------------------------------|-----------------------------------------|-----------------|---------------------------------------------|----------------------------------------------|-----------------------------------------------|-----------------------------------------------|
|                                           | <i>S. thermophilus</i> phages:          |                 |                                             |                                              | <i>L. cremoris</i> phages:                    |                                               |
|                                           | SW13                                    | STP1            | P738                                        | SW16                                         | sk1                                           | c2                                            |
| AbiEi/Eii_90730                           | $4 \times 10^{-2} \pm 8 \times 10^{-2}$ | $0.54 \pm 0.07$ | $0.27 \pm 0.10$                             | $6.6 \times 10^{-3} \pm 9.8 \times 10^{-3}$  | $0.61 \pm 0.05$                               | $1.15 \pm 0.34$                               |
| AbiEi/Eii + up/downstream sequence_90730  | $0.42 \pm 0.11$                         | $0.9 \pm 0.03$  | $0.95 \pm 0.21$                             | $0.52 \pm 0.10$                              | $1.01 \pm 0.12$                               | $0.91 \pm 0.06$                               |
| Kiwa_90730                                | $0.39 \pm 0.02$                         | $0.67 \pm 0.1$  | $0.73 \pm 0.17$                             | $0.34 \pm 0.04$                              | $5.17 \times 10^{-5} \pm 5.33 \times 10^{-6}$ | $3.56 \times 10^{-4} \pm 5.68 \times 10^{-5}$ |
| GAO_19_R1                                 | $0.37 \pm 0.07$                         | $0.86 \pm 0.08$ | $0.26 \pm 6.9 \times 10^{-2}$               | $3.8 \times 10^{-3} \pm 2.3 \times 10^{-3}$  | $1.52 \pm 0.25$                               | $0.97 \pm 0.06$                               |
| Hachiman type I_ST19                      | $1.33 \pm 0.13$                         | $0.66 \pm 0.06$ | $0.35 \pm 0.1$                              | $8.4 \times 10^{-3} \pm 5 \times 10^{-3}$    | $1.18 \pm 0.03$                               | $1.02 \pm 0.05$                               |
| AbiD_ST55                                 | ND                                      | $0.59 \pm 0.12$ | ND                                          | ND                                           | $1.16 \pm 0.26$                               | $0.88 \pm 0.08$                               |
| AbiD + up/downstream sequence_ST55        | $1.12 \pm 0.07$                         | $0.46 \pm 0.1$  | $1.63 \pm 0.35$                             | $1.1 \times 10^{-2} \pm 6.0 \times 10^{-3}$  | $1.13 \pm 0.03$                               | $1.14 \pm 0.06$                               |
| GAO_19_ST4021                             | $\leq 1 \times 10^{-7}$                 | $0.21 \pm 0.05$ | $0.50 \pm 0.30$                             | $4.0 \times 10^{-2} \pm 4.7 \times 10^{-3}$  | $2.77 \times 10^{-5} \pm 7.16 \times 10^{-6}$ | $0.71 \pm 0.11$                               |
| AbiD_ST4021                               | $0.23 \pm 0.04$                         | $0.73 \pm 0.25$ | $7.2 \times 10^{-2} \pm 2.7 \times 10^{-3}$ | $0.19 \pm 0.03$                              | $1.07 \pm 0.03$                               | $1.04 \pm 0.10$                               |
| AbiD + up/downstream sequence_ST4021      | $0.54 \pm 0.11$                         | $0.56 \pm 0.3$  | $0.29 \pm 8.2 \times 10^{-2}$               | $3.0 \times 10^{-3} \pm 5 \times 10^{-3}$    | $1.03 \pm 0.08$                               | $1.15 \pm 0.32$                               |
| AbiD_ST4078                               | $0.44 \pm 0.05$                         | $0.20 \pm 0.07$ | $0.20 \pm 0.07$                             | $1.52 \times 10^{-2} \pm 2.4 \times 10^{-3}$ | $4.97 \times 10^{-4} \pm 1.5 \times 10^{-5}$  | $0.66 \pm 0.19$                               |
| AbiD + up/downstream sequence_ST4078      | ND                                      | ND              | ND                                          | ND                                           | $0.30 \pm 0.04$                               | $0.72 \pm 0.19$                               |
| Gabija_ST4145                             | $1.03 \pm 0$                            | $0.46 \pm 0.1$  | $0.79 \pm 0.11$                             | $0.34 \pm 0.07$                              | $0.90 \pm 0.06$                               | $0.90 \pm 0.13$                               |
| PD-T4-6_ST4078                            | ND                                      | ND              | ND                                          | ND                                           | $0.96 \pm 0.22$                               | $0.75 \pm 0.08$                               |
| PD-T4-6 + upstream sequence_ST4078        | ND                                      | ND              | ND                                          | ND                                           | $0.24 \pm 0.03$                               | $0.48 \pm 0.22$                               |
| Dodola_90729                              | ND                                      | $0.7 \pm 0.23$  | ND                                          | ND                                           | $0.90 \pm 0.10$                               | $0.67 \pm 0.16$                               |
| SoFic_MM20                                | $1.41 \pm 0.03$                         | $0.76 \pm 0.06$ | $0.71 \pm 0.17$                             | $5.8 \times 10^{-3} \pm 2.3 \times 10^{-3}$  | $0.80 \pm 0.02$                               | $0.63 \pm 0.03$                               |
